# Supplementary material for: Capture and detection of a quencher labeled oligonucleotide by poly(phenylene ethynylene) particles
Source: Royal Society of Chemistry journal article supplement (doi:10.1039/b207186j), 2002-12-19
Supplement: b207186j.doc [file b207186j.doc]

Capture and detection of a quencher labeled oligonucleotide by poly(phenylene ethynylene) particles

Joong Ho Moon, Robert Deans, Elizabeth Krueger and Lawrence F. Hancock*

Nomadics, Inc., 61 Rogers Street, Cambridge MA 02142

All chemicals were purchased from Aldrich and used as received. 20X SSPE (Saline Sodium Phosphate EDTA: 0.2 M phosphate buffer, pH~7.4, containing 2.98 M NaCl and 0.02 M EDTA) was purchased from Sigma, and diluted with water (DNAse RNAse free, Sigma). Cy-5 labeled oligonucleotide (190192 pmole, 16 bases: 5’-Cy-5-C3-AGATTTCCCACTTACG-3’, 4782.11 g/mol) was purchased from Biosource International (CA), and dissolved in 0.6 ml of 20X SSPE (3.17x10-4 M). The stock solution was further diluted with water to make a certain concentration. For example, 100 µl of 1x10-5 M was made by diluting 3.2 µl of the stock solution with water. The resulting buffer concentration was ~0.7X SSPE. UV-vis spectra were recorded using Hewlett Packard 8453 Diode array spectrophotometer. Fluorescence spectra were obtained by using FluoroMax. Transmission electron microscopic study was carried out using JEOL JEM 100 CX II Scanning Transmission Electron Microscope. TEM samples were prepared by placing a drop of the particle solution on one side of a Cu grid. After a few minutes, excess solution was removed by wicking it away with filter paper. The grid was introduced into the instrument after ~ 1 hour aging under ambient conditions.

**Synthesis.**

Scheme S1. Synthetic route of polymer **1**.

Polymer **1** was synthesized by Pd(0) catalyzed cross coupling of thepentiptycene diacetylene **(**100 mg, 20.9 mmol)**, 2** (77 mg, 10.4 mmol) and **3** (83 mg, 10.4 mmol) in a degassed solution of DMF/diisopropylamine (6:4=v/v) at 80 oC for 16 hrs. The polymer was recovered by precipitation in methanol, re-dissolved and precipitated in acetone to give a yellow powder (130 mg, yield 67 %). Molecular weight (Mn) and poly dispersity index (PDI) were estimated by GPC as 26,000 and 1.8, respectively, (PMMA standards in 0.1M LiBr DMF). 1H NMR (400 MHz, DMSO-d6): 7.90, 7.83, 7.60, 7.10, 6.20, 4.64, 4.54, 4.06, 3.47, 3.40, 3.37, 3.21, 2.53, 2.24, 2.03, 1.01. 13C NMR (100 MHz, DMSO-d6): 172.57, 171.79, 153.32, 144.42, 144.08, 125.50, 123.73, 117.21, 113.49, 72.03, 69.68, 69.01, 68.12, 65.40, 63.04, 60.11, 38.50, 34.80, 33.16, 28.95, 28.69, 21.93, 21.26, 14.95.

Monomer **2**: A 5.07 g (8.6 mmole) of **4,** 35 g (260 mmole) of diethyleneglycolehtylether, and ~0.2 ml of conc. H2SO4 were combined in 100 ml of round bottom flask. The reaction mixture was heated to 70 oC for a week. After distilling off the excess ethylether, the dark red oil was purified by column chromatography (hexane/ethylacetate=2/1, v/v). 3.8 g of light orange oil was obtained (56 %). 1H NMR (400 MHz, CDCl3): 7.16 (s, 2H), 4.25 (t, 4H), 3.94 (t, 4H), 3.71 (t, 4H), 3.64 (m, 4H), 3.59 (m, 4H), 3.53 (q, 4H), 2.45 (t, 4H), 1.86 (m, 8H), 1.21 (t, 6H). 13C NMR (100 MHz, CDCl3): 173.23, 152.75, 122.76, 86.20, 70.59, 69.75, 69.69, 69.12, 66.60, 63.40, 33.66, 28.47, 21.55, 15.10.

Monomer **3**: A reaction mixture of 6.0 g (10 mmole) of **4**, 21 ml (209 mmol) of aminoethoxyethanol, and ~1 gram KOH in 9 ml of DMF was heated to 70 oC with Ar bubbling for 4 days. The reaction was cooled to room temperature. The mixture was extracted with CHCl3/water, the organic layer was dried over magnesium sulfate and then concentrated. (During the extraction, a suspension formed in both the organic and aqueous phase. This limited the yield.) The crude product was purified by column chromatography (methylene chloride/ethanol=7/1, v/v). 1.2 g (16 mmol, 16 % yield) of white powder was obtained. 1H NMR (400 MHz, CD3OD): 7.27 (s, 2H), 3.97 (t, 4H), 3.66 (t, 4H), 3.53 (m, 8H), 3.37 (t, 4H), 2.29 (t, 4H), 1.82 (m, 8H). 13C NMR (100 MHz, CD3OD): 176.02, 154.37, 124.15, 87.07, 73.42, 70.96, 70.64, 62.24, 40.41, 36.61, 29.79, 23.73.

Compound **4**: A 10.0 g (26.5 mmole) of 2,5-Diiodo-benzene-1,4-diol and 18.3 g (132.5 mmole) of K2CO3 were combined in DMF (52 ml), and then the reaction mixture was degassed for 15 min. After adding 15.5 g (79.4 mmole) of methyl-5-bromovalerate by syringe, the reaction mixture was heated to 75 oC for 3 days. Excess of K2CO3 was filtered off, and the filterate was concentrated using rotary evaporator. The resulting reddish oil was dissolved in dichloromethane and washed with water 2 times. The organic layer was dried over sodium sulfate, and concentrated. The oil was dried under vacuum, resulting in solidification. The brown powder was re-dissolved in DMF, followed by precipitation with water. Recrystalization of the powder was carried out in hot methanol/acetone. Colorless crystals (10.26 g, 17.4 mmole). 66 % yield. 1H NMR (400 MHz, acetone-d6): 7.35 (s, 2H), 4.05 (t, 4H), 3.62 (s, 6H), 2.42 (t, 4H), 1.84 (m, 8H). 13C NMR (100 MHz, CDCl3): 173.80, 152.80, 122.80, 86.25, 69.73, 51.53, 33.62, 28.57, 21.66.

**Particle Formation and Cy-5 Oligonucleotide Detection.** A 20 µl of solution of **1** in DMSO (0.1 mg/ml) was added to 2ml of 1X SSPE buffer with rapid stirring. Reference emission and absorption spectra of the particles were collected. Then 20 µl of 1 µM Cy-5 oligonucleotide in SSPE was added with a gentle shaking to the particle solution. The final emission spectrum of the Cy-5 oligonucleotide quenched PPE particles was then recorded.

Figure S1. Absorption and emission spectra of **1** in DMSO solution (dot line), in 1X SSPE (particles; solid line), and as a spin cast film (dashed line).

Fig S2. Stern-Volmer analysis of fluorescence quenching of **1** as dispersed particles in 1X SSPE by Cy-5 labeled oligonucleotides.
